# Supplementary material for: Elevated Expression of Growth Differentiation Factor-15 Is Associated With Acute Exacerbation of Idiopathic Pulmonary Fibrosis
Source: PubMed Central journal article supplement (PMC9241490; doi:10.3389/fimmu.2022.891448), 2022-06-15

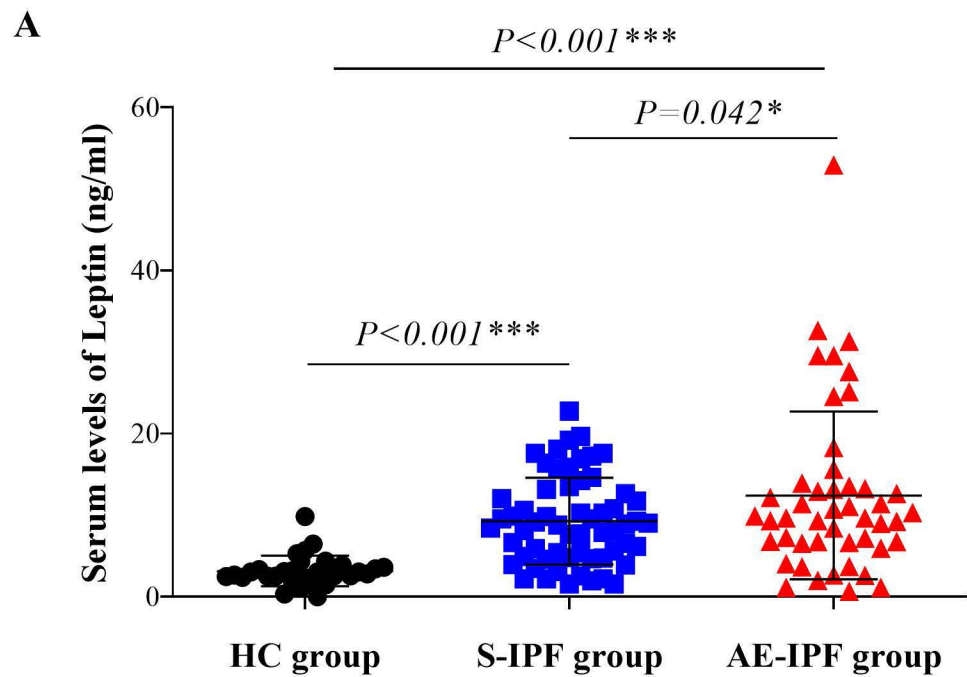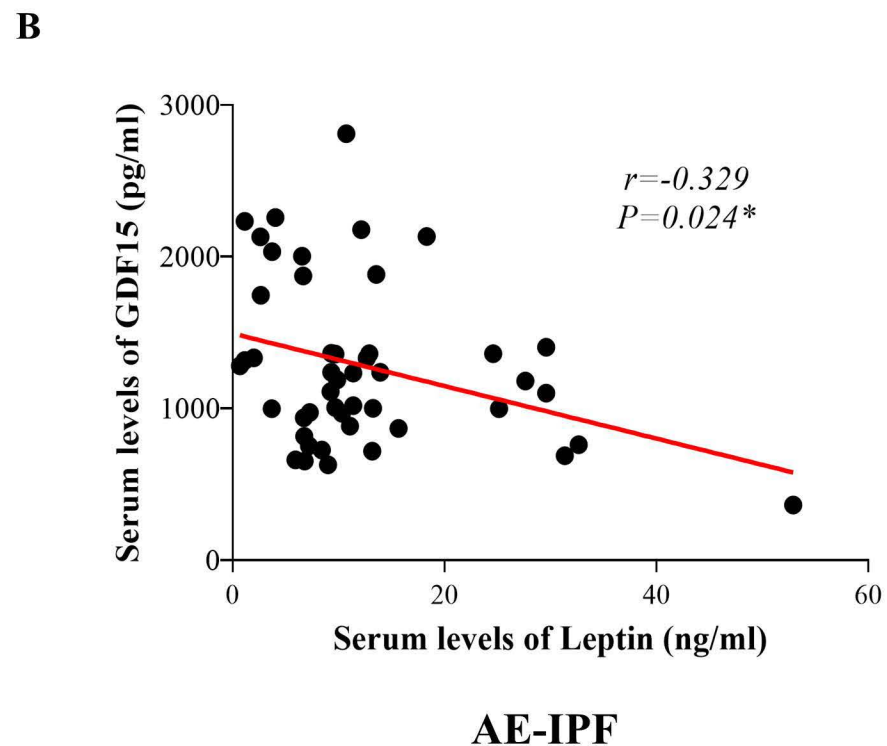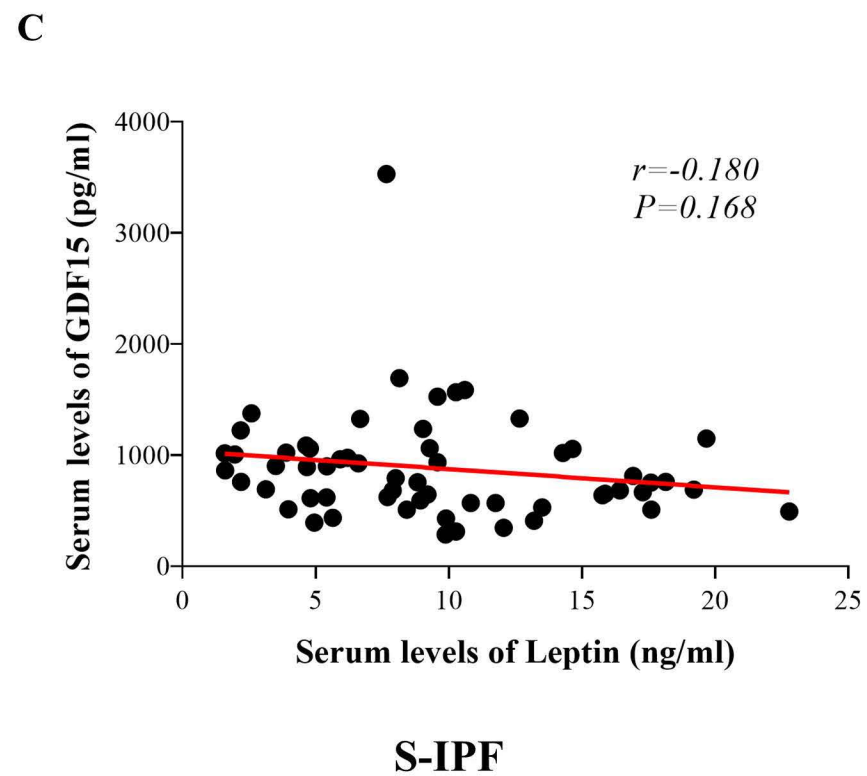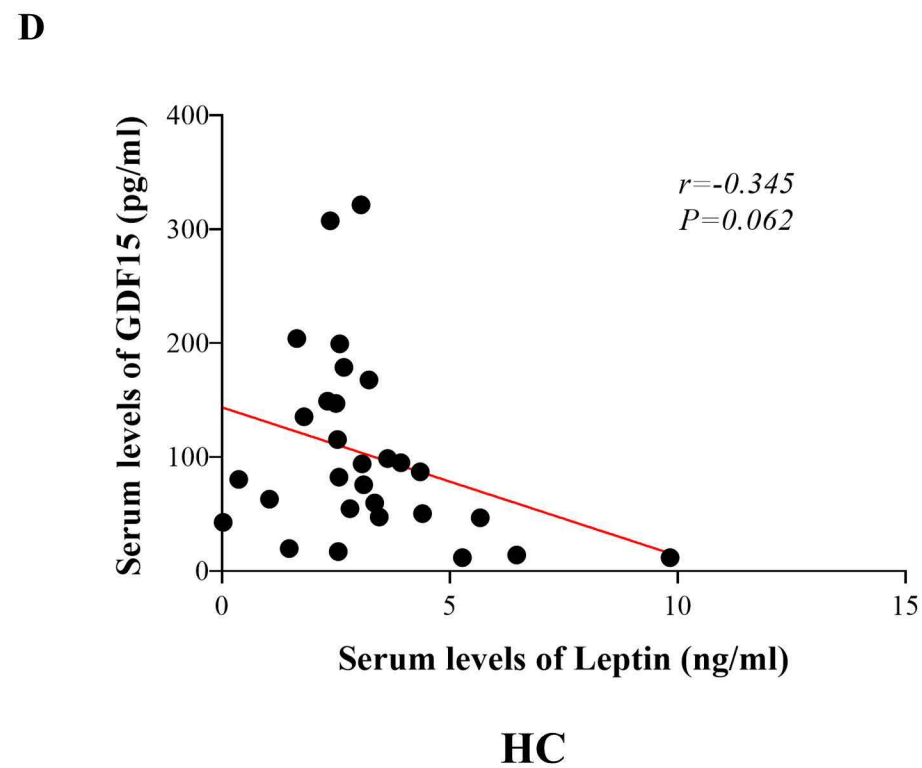

Supplement: Image_1.pdf [file Image_1.pdf]
