# Supplementary material for: Elevated Expression of Growth Differentiation Factor-15 Is Associated With Acute Exacerbation of Idiopathic Pulmonary Fibrosis
Source: PubMed Central journal article supplement (PMC9241490; doi:10.3389/fimmu.2022.891448), 2022-06-15
Supplement: Table_1.pdf [file Table_1.pdf]

## Supplementary Data

**Suppl. Table 1:** Baseline clinical characteristics in three groups of HC, S-IPF and AE-IPF.

|                               | <b>HC group</b> | <b>S-IPF group</b> | <b>AE-IPF group</b> | <b>P value</b> |
|-------------------------------|-----------------|--------------------|---------------------|----------------|
| Gender (M/F)                  | 23/8            | 49/12              | 37/10               | 0.794          |
| Age (years old)               | 66.16±9.11      | 66.97±8.33         | 68.53±7.24          | 0.085          |
| Complications (Y/N)           | -               | 27/34              | 25/22               | 0.438          |
| Prior Antifibrotics use (Y/N) | -               | 12/49              | 6/41                | 0.438          |
| GDF15 (pg/ml)                 | 107.82±14.21    | 891.30±479.90      | 1279.22±540.02      | <0.001         |
| Leptin (ng/ml)                | 3.18±1.88       | 9.15±5.41          | 12.44±10.27         | <0.001         |
| WBC (*10 <sup>9</sup> )       | 5.83±1.71       | 6.56±1.98          | 10.25±3.72          | <0.001         |
| TG (mmol/L)                   | 1.07±0.45       | 1.56±1.12          | 1.09±0.85           | 0.003          |
| TCHL (mmol/L)                 | 4.67±0.61       | 4.36±0.93          | 4.35±1.01           | 0.014          |
| HCHL (mmol/L)                 | 1.53±0.45       | 1.19±0.60          | 1.14±0.55           | 0.853          |
| LCHL (mmol/L)                 | 2.65±0.56       | 2.59±0.68          | 2.56±0.85           | 0.022          |
| Apo AI (g/L)                  | 1.36±0.25       | 1.10±0.30          | 0.97±0.28           | 0.899          |
| Apo B (g/L)                   | 0.84±0.13       | 0.85±0.21          | 0.91±0.22           | 0.282          |
| AIB (g/L)                     | 46.85±2.89      | 39.36±4.09         | 33.13±5.58          | 0.451          |
| GLU (mmol/L)                  | 5.50±1.00       | 5.34±1.77          | 6.75±2.14           | <0.001         |
